# Supplementary material for: Direct attenuation of Arabidopsis ERECTA signalling by a pair of U-box E3 ligases
Source: PubMed Central journal article supplement (PMC9873567; doi:10.1038/s41477-022-01303-x), 2022-12-20

Fig. 2d, e

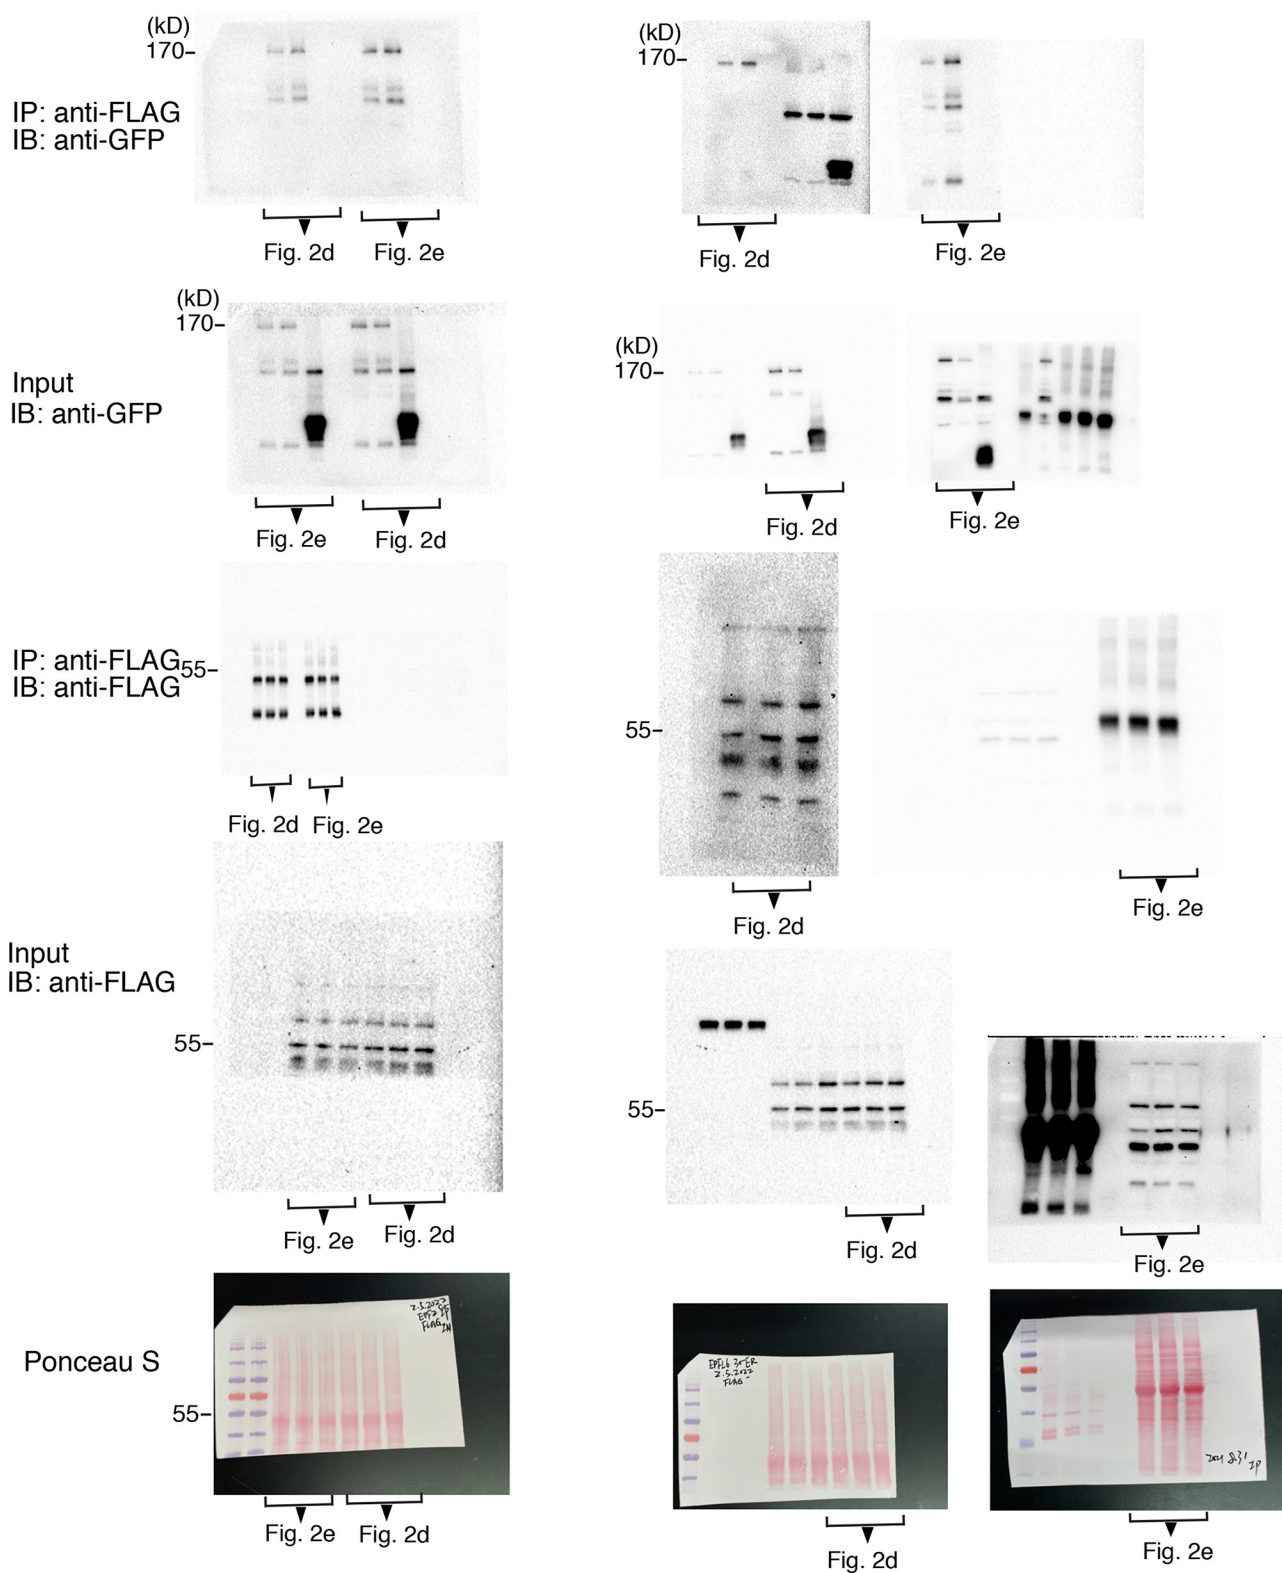

The above:  
EPF2 treatment for PUB30-ERECTA (Fig.2d)  
and PUB31-ERECTA (Fig.2e)

The above:  
EPFL6 treatment for PUB30-ERECTA (Fig.2d)  
and PUB31-ERECTA (Fig.2e)

Fig. 3a

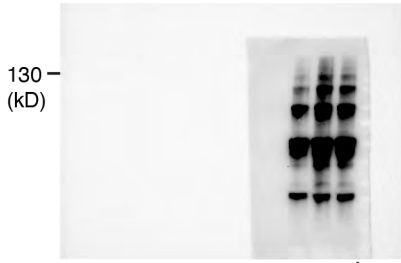

IB: anti-Ub

Fig. 3a

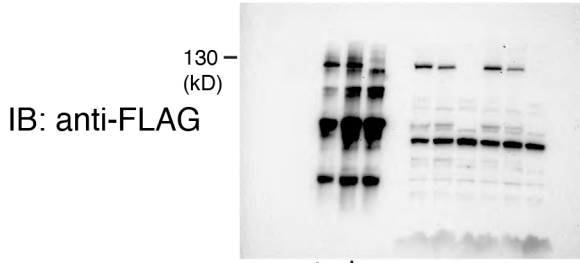

IB: anti-FLAG

Fig. 3a

Fig. 3e

IP: anti-FLAG  
IB: anti-HA

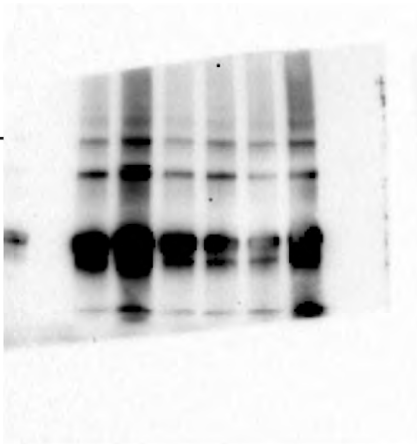

IB: anti-FLAG

130-

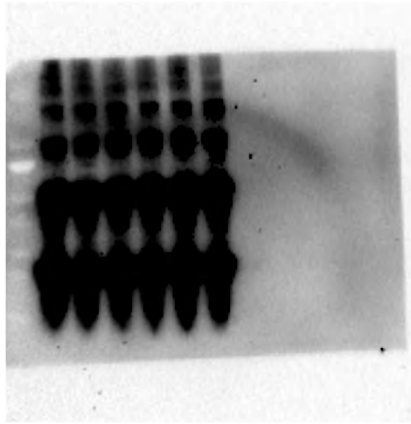

IB: anti-MYC

55-

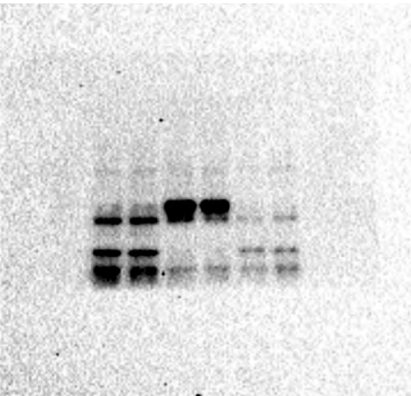

Fig. 3c

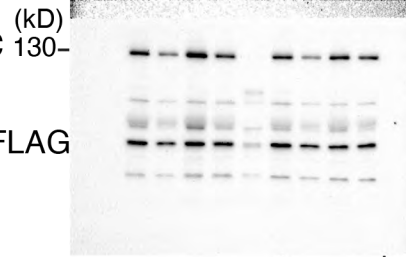

IB: anti-FLAG

Fig. 3c

IB: anti-actin

40-

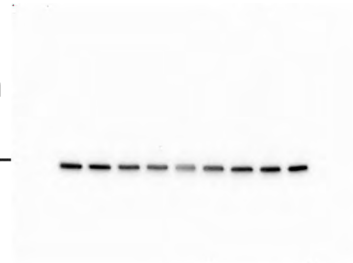

Fig. 3c

Ponceau S

55-

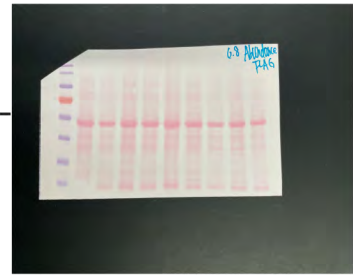

Fig. 3c

IB: anti-HA

130-

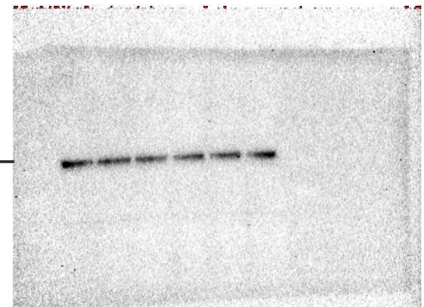

Ponceau S

55-

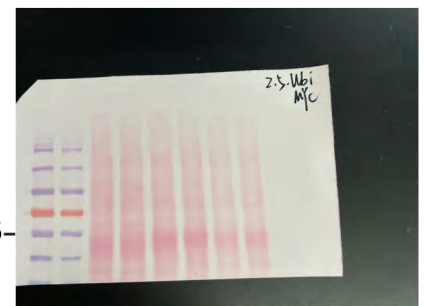

Fig. 3c

Fig. 4d

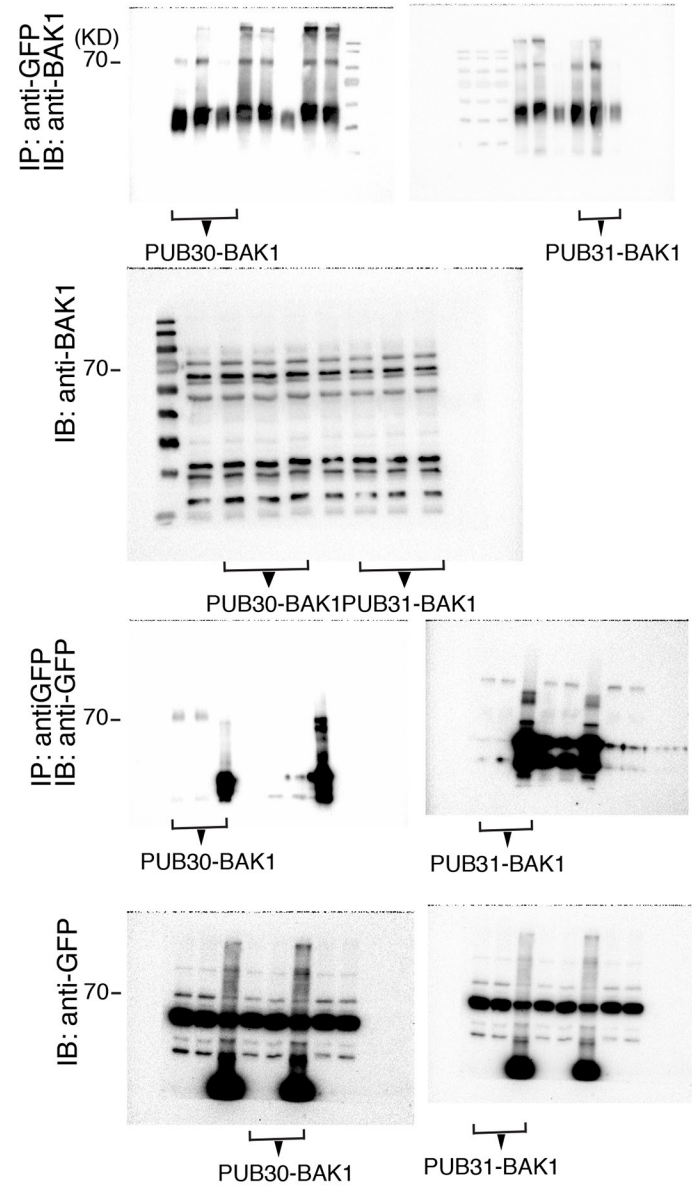

Fig. 4e, f

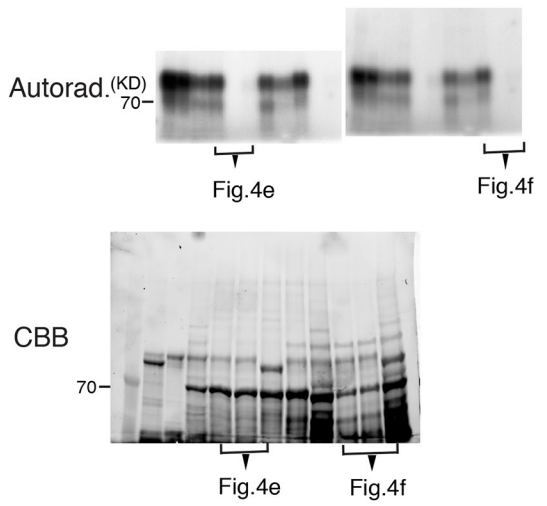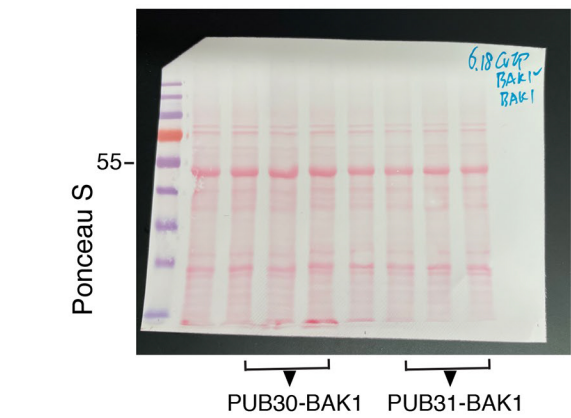

Fig. 5a

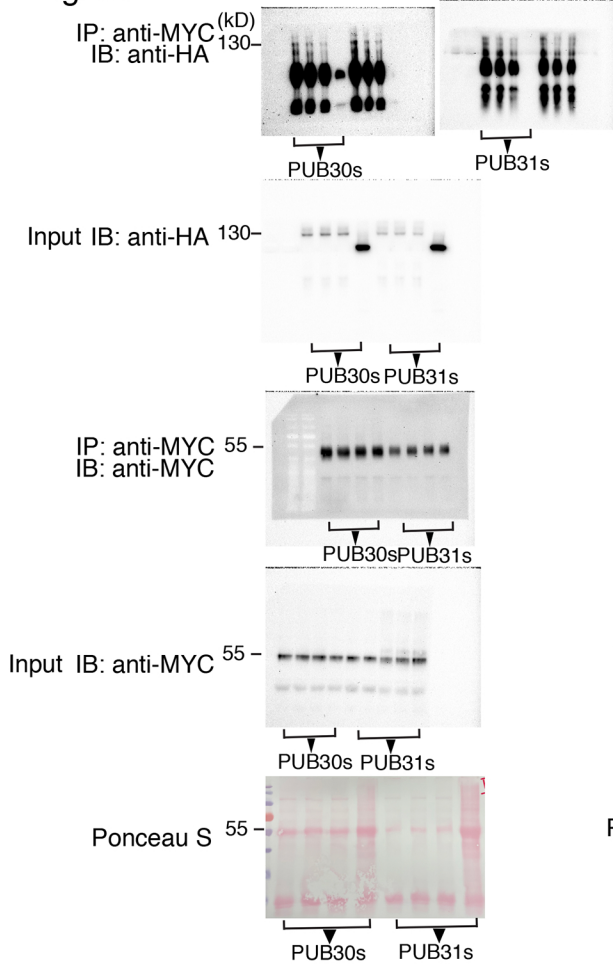

Fig. 5b

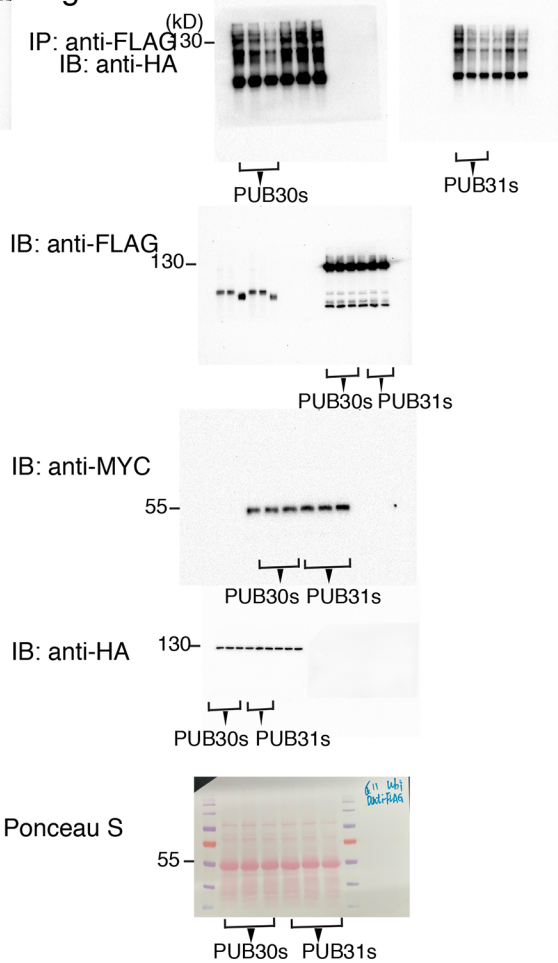

Fig. 5c

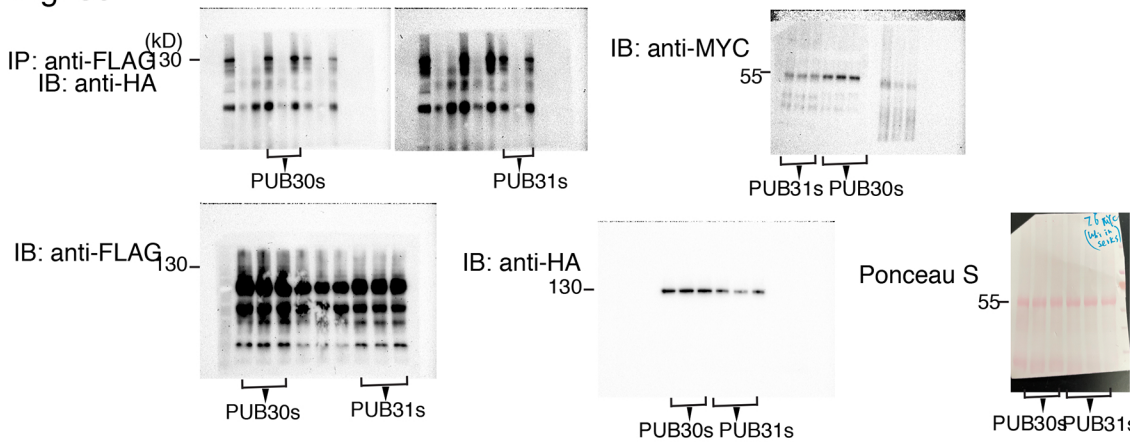

Extended Fig. 2c, d

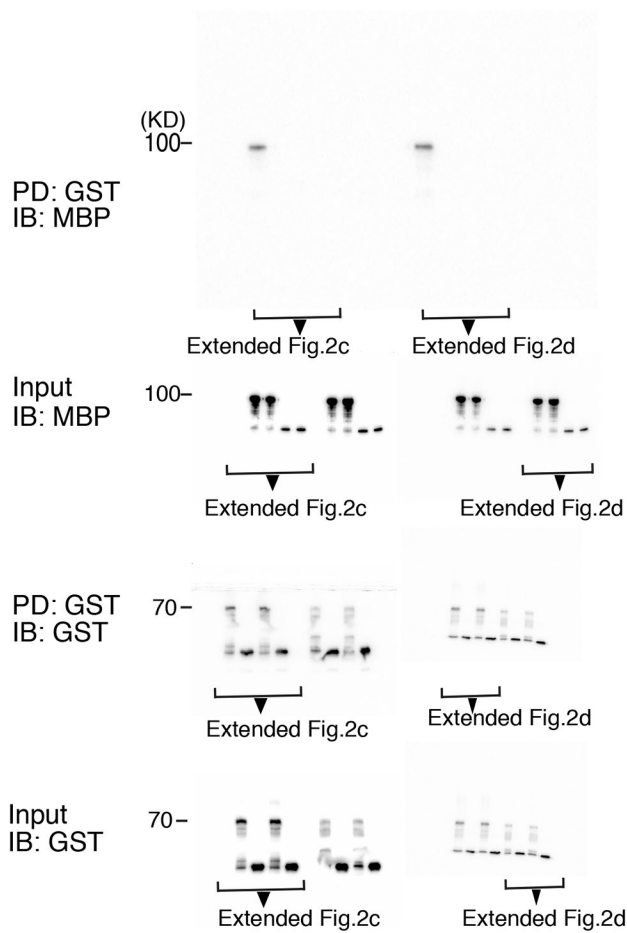

Extended Fig. 2f, g

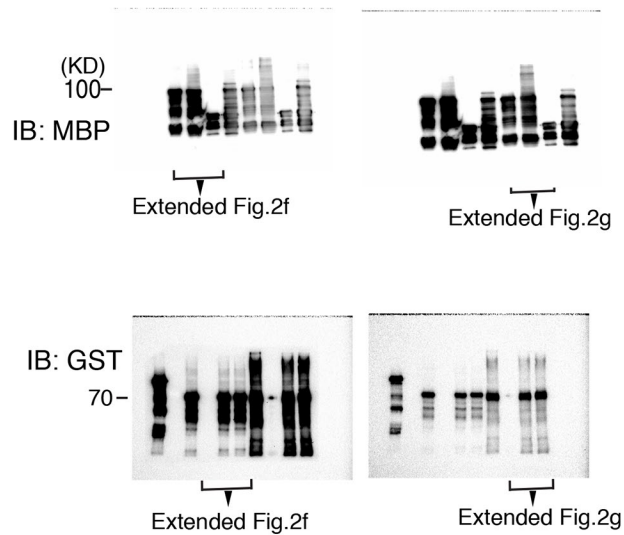



Extended Fig. 3b

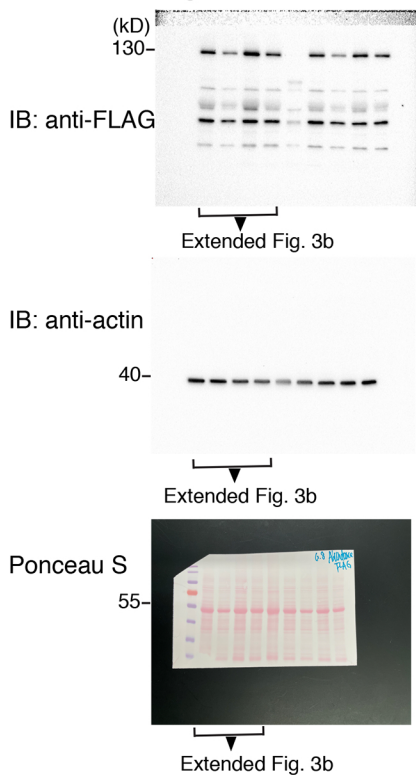

Extended Fig. 3e

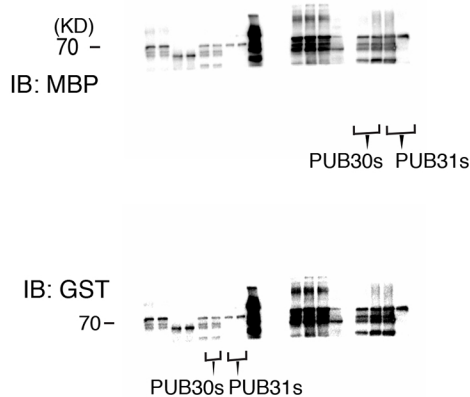

Extended Fig. 3f

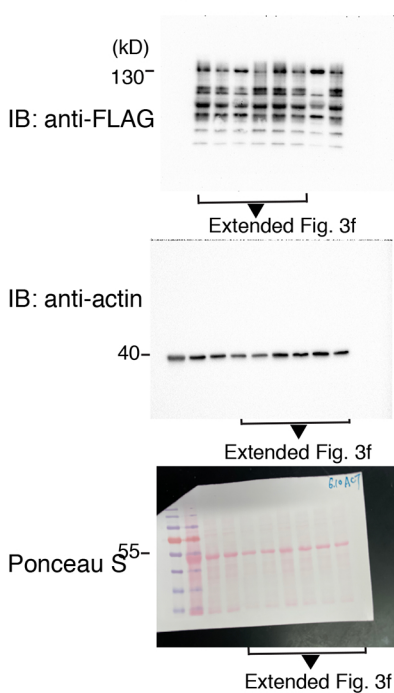

Extended Fig. 3g

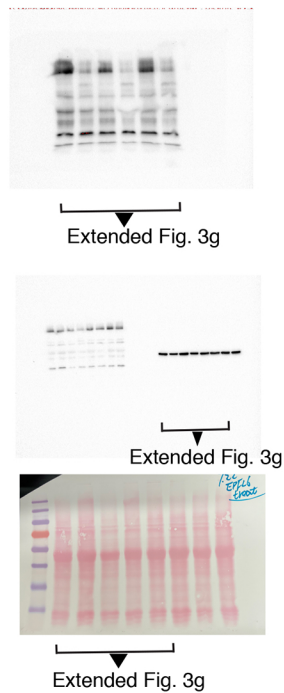

Extended Fig. 5a, b

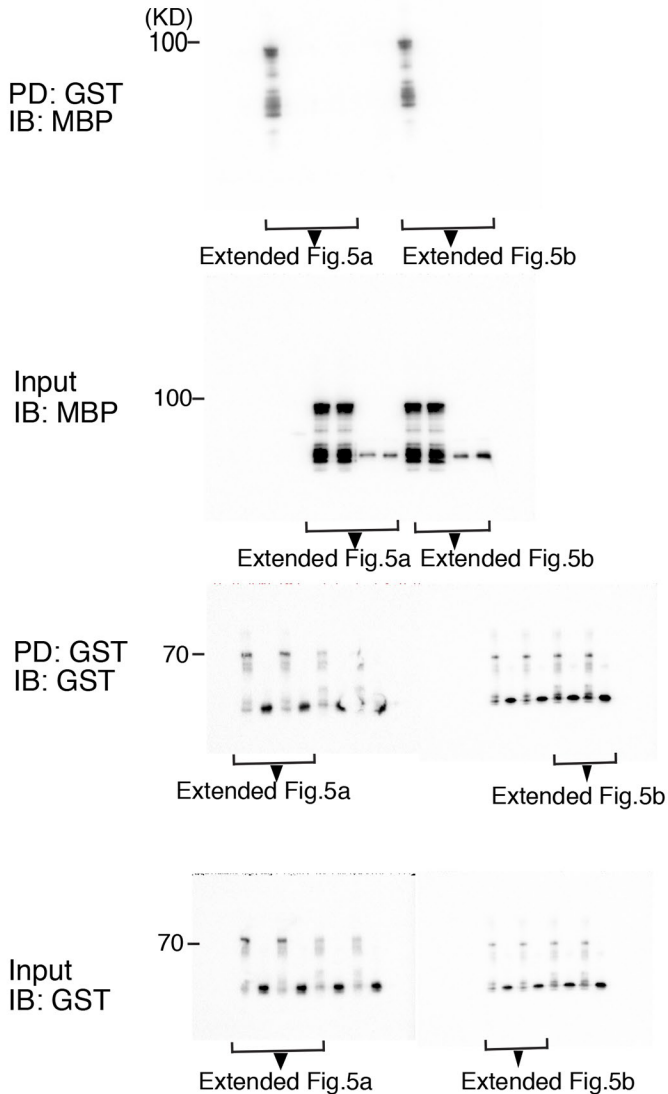

Extended Fig. 5c

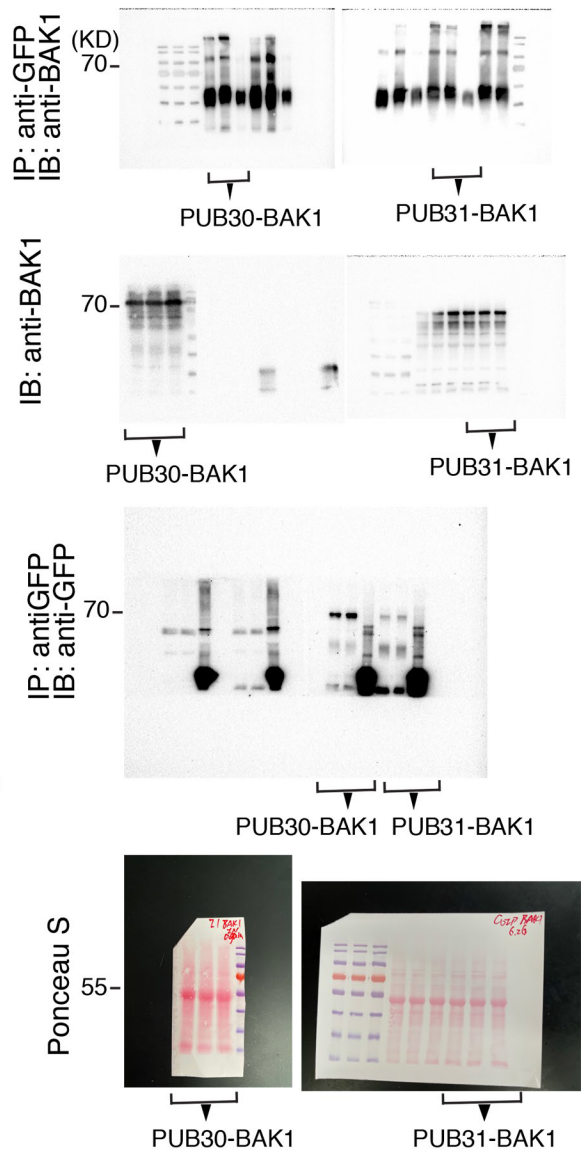

Extended Fig. 6a

Extended Fig. 6b

Extended Fig. 6c

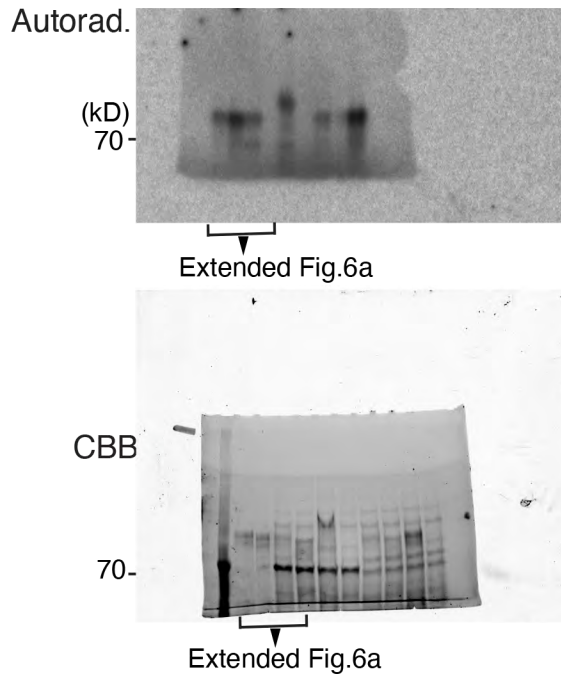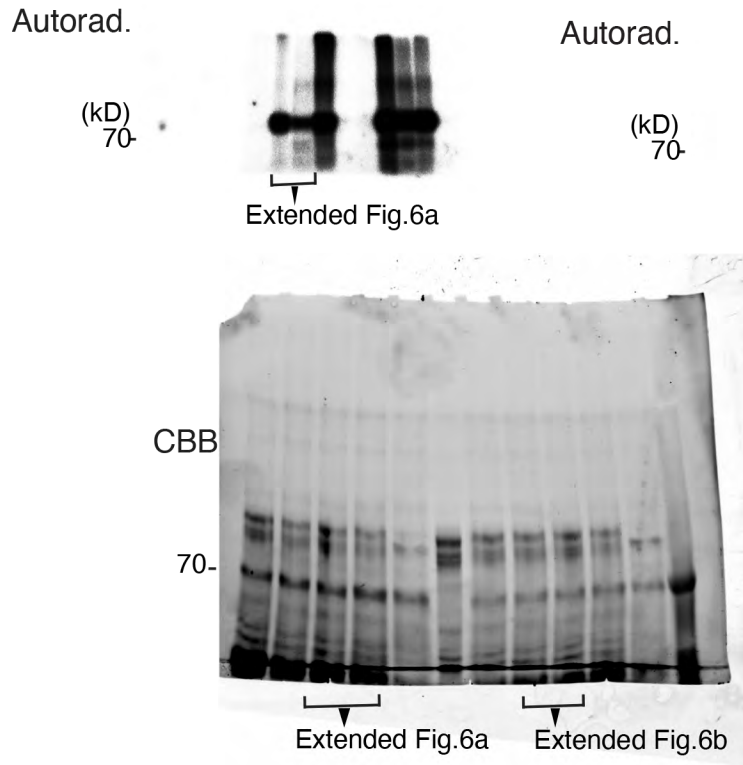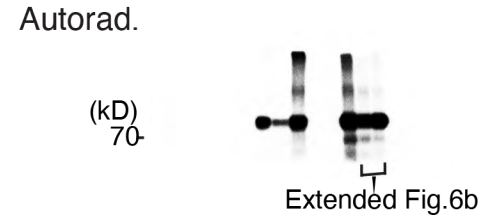

Extended Fig. 6e

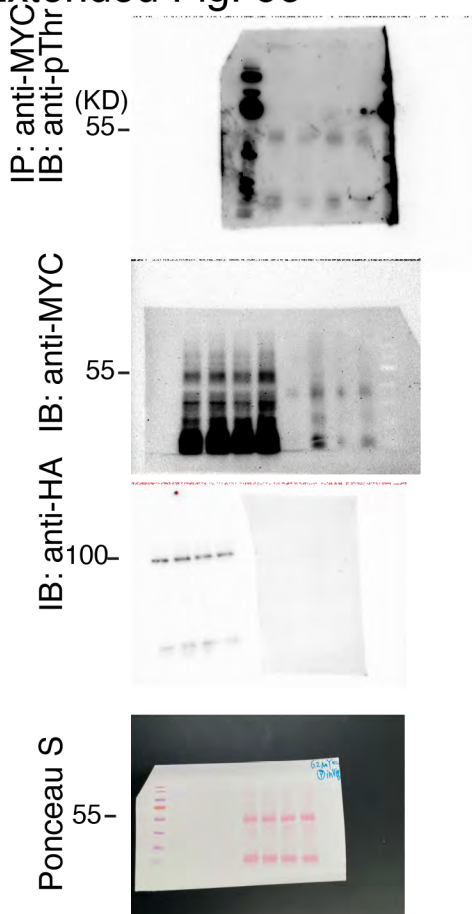



Extended Fig. 7a

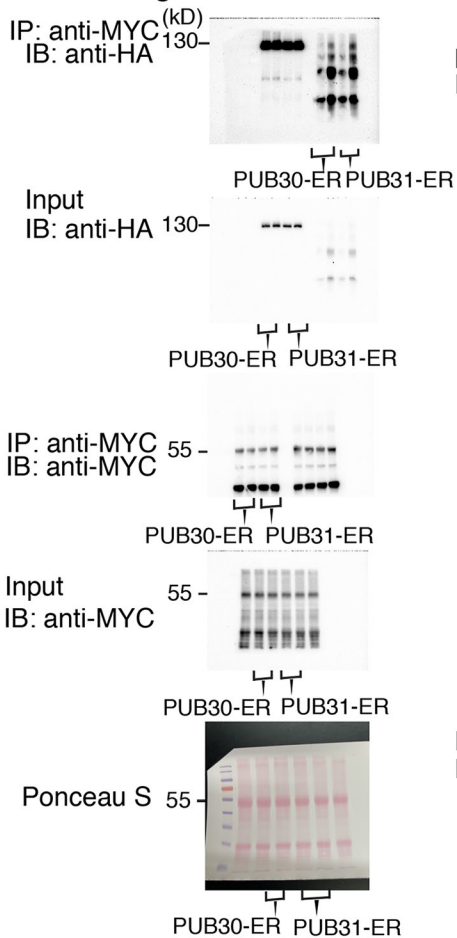

Extended Fig. 7b

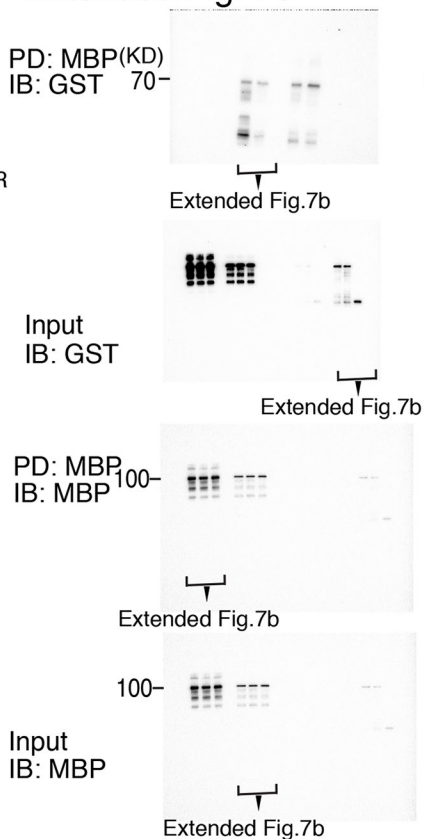

Extended Fig. 7c

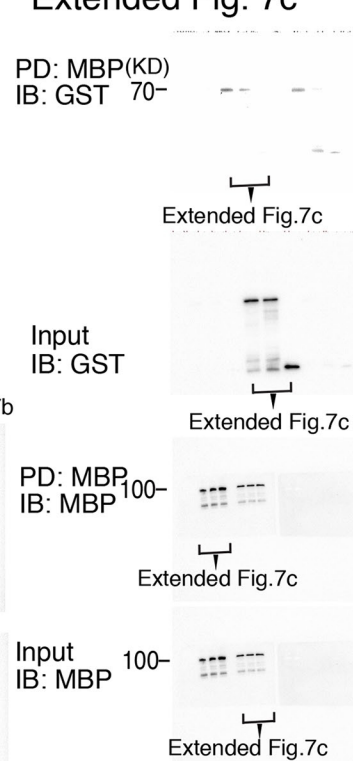

Extended Fig. 7f,g

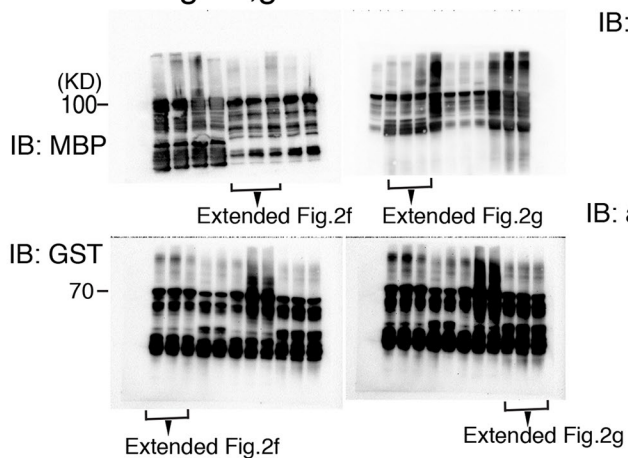

Extended Fig. 7h, i

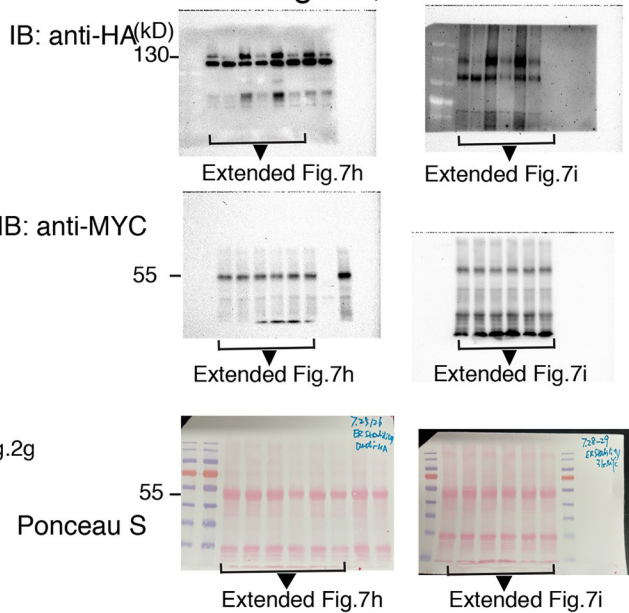

### Extended Fig. 8a

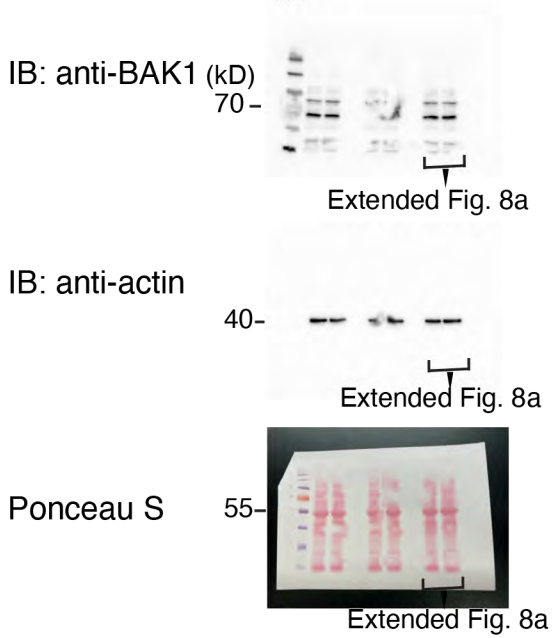

### Extended Fig. 8b, c

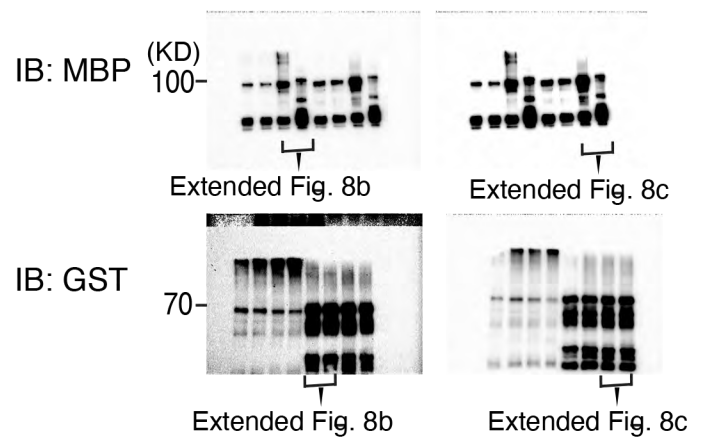

### Extended Fig. 8d, e

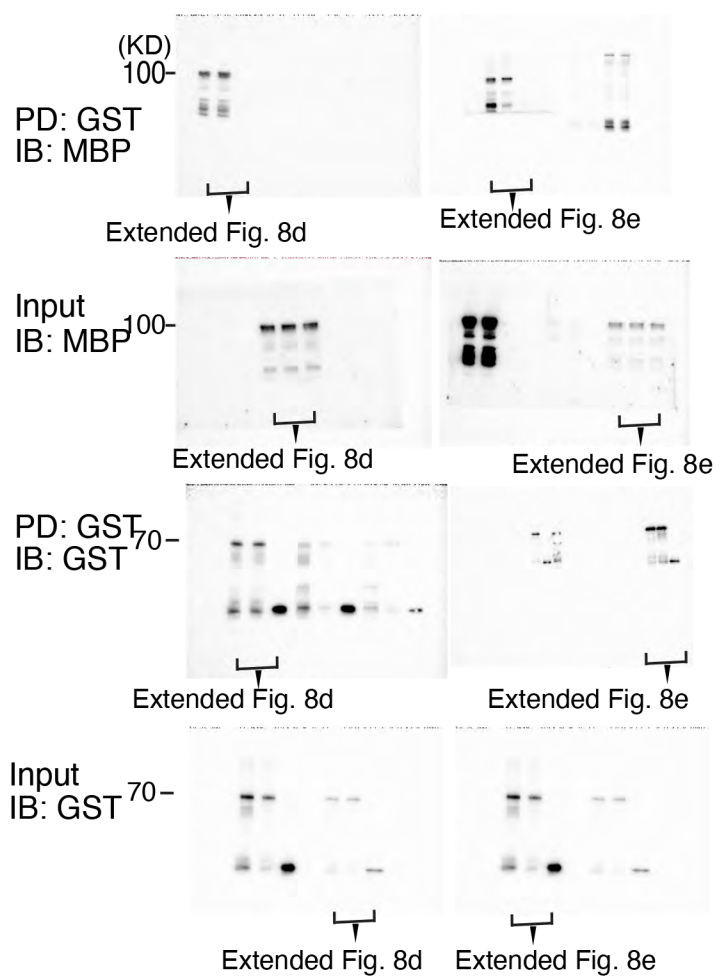

### Extended Fig. 8f, g

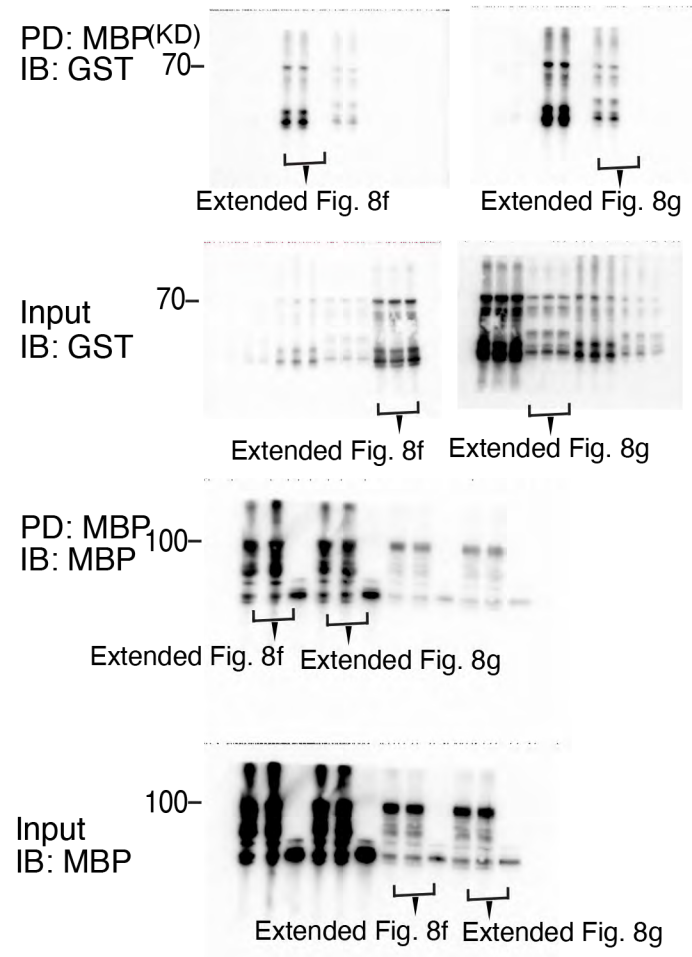

Extended Fig. 9a

Extended Fig. 9b

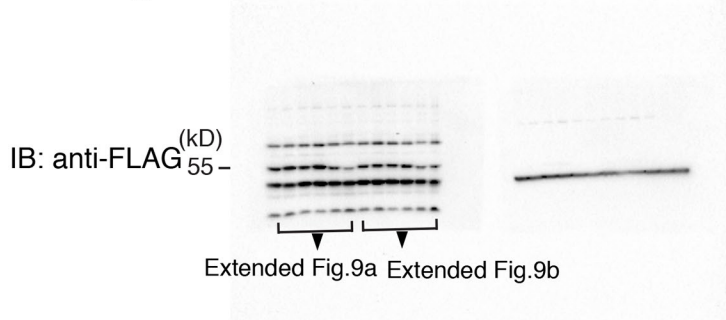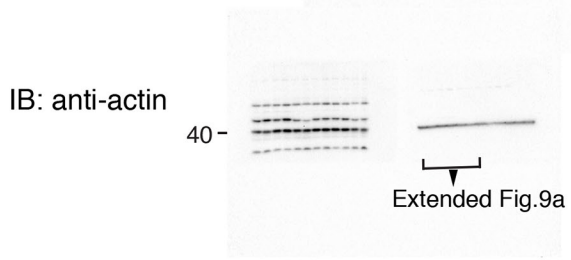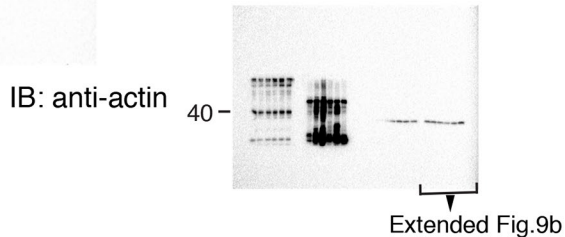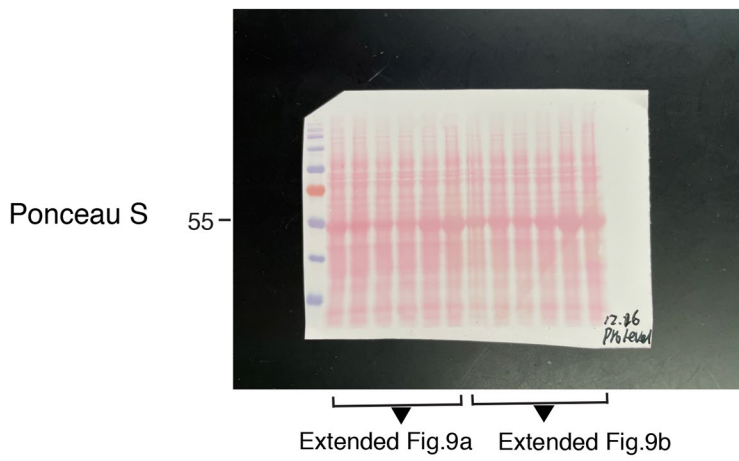

Supplement: 41477_2022_1303_MOESM5_ESM.pdf [file 41477_2022_1303_MOESM5_ESM.pdf]
