# Supplementary material for: Direct attenuation of Arabidopsis ERECTA signalling by a pair of U-box E3 ligases
Source: PubMed Central journal article supplement (PMC9873567; doi:10.1038/s41477-022-01303-x), 2022-12-20
Supplement: 41477_2022_1303_MOESM4_ESM.pdf [file 41477_2022_1303_MOESM4_ESM.pdf]

### #Extended Dataset p-values for One-way ANOVA-Tukey's HSD Test

#### #Fig. 1c, Pedicel Length

| \$genotype                 | diff     | lwr         | upr           | p adj     |
|----------------------------|----------|-------------|---------------|-----------|
| pub30-er105                | 6.1450   | 5.2591501   | 7.030849854   | 0.0000000 |
| pub30pub31-er105           | 16.1170  | 15.2311501  | 17.002849854  | 0.0000000 |
| pub30pub31er105-er105      | 0.2855   | -0.6003499  | 1.171349854   | 0.9368058 |
| pub31-er105                | 5.4495   | 4.5636501   | 6.335349854   | 0.0000000 |
| WT-er105                   | 5.2680   | 4.3821501   | 6.153849854   | 0.0000000 |
| pub30pub31-pub30           | 9.9720   | 9.0861501   | 10.857849854  | 0.0000000 |
| pub30pub31er105-pub30      | -5.8595  | -6.7453499  | -4.973650146  | 0.0000000 |
| pub31-pub30                | -0.6955  | -1.5813499  | 0.190349854   | 0.2125546 |
| WT-pub30                   | -0.8770  | -1.7628499  | 0.008849854   | 0.0539795 |
| pub30pub31er105-pub30pub31 | -15.8315 | -16.7173499 | -14.945650146 | 0.0000000 |
| pub31-pub30pub31           | -10.6675 | -11.5533499 | -9.781650146  | 0.0000000 |
| WT-pub30pub31              | -10.8490 | -11.7348499 | -9.963150146  | 0.0000000 |
| pub31-pub30pub31er105      | 5.1640   | 4.2781501   | 6.049849854   | 0.0000000 |
| WT-pub30pub31er105         | 4.9825   | 4.0966501   | 5.868349854   | 0.0000000 |
| WT-pub31                   | -0.1815  | -1.0673499  | 0.704349854   | 0.9912615 |

#### #Fig. 1g, Stomatal Index

| \$genotype       | diff       | lwr         | upr       | p adj     |
|------------------|------------|-------------|-----------|-----------|
| pub30pub31-pub30 | -7.0634924 | -11.6940092 | -2.432976 | 0.0014561 |
| pub31-pub30      | 0.2354632  | -4.3950536  | 4.865980  | 0.9990212 |
| WT-pub30         | 4.1883996  | -0.4421172  | 8.818916  | 0.0870800 |
| pub31-pub30pub31 | 7.2989556  | 2.6684389   | 11.929472 | 0.0010078 |
| WT-pub30pub31    | 11.2518920 | 6.6213753   | 15.882409 | 0.0000020 |
| WT-pub31         | 3.9529364  | -0.6775804  | 8.583453  | 0.1150998 |

#### #Fig. 1i, Stomata + Meristemoid Index

| \$genotype                 | diff        | lwr        | upr       | p adj     |
|----------------------------|-------------|------------|-----------|-----------|
| pub30pub31-er105           | -13.1269794 | -17.488857 | -8.765102 | 0.0000000 |
| pub30pub31er105-er105      | -1.4396448  | -5.801522  | 2.922233  | 0.8042911 |
| WT-er105                   | -1.8750874  | -6.236965  | 2.486790  | 0.6479836 |
| pub30pub31er105-pub30pub31 | 11.6873346  | 7.325457   | 16.049212 | 0.0000003 |
| WT-pub30pub31              | 11.2518920  | 6.890015   | 15.613770 | 0.0000007 |
| WT-pub30pub31er105         | -0.4354426  | -4.797320  | 3.926435  | 0.9927599 |

#### #Extended Fig.1e Pedicel lengths of complementation lines

| \$genotype              | diff        | lwr       | upr       | p adj     |
|-------------------------|-------------|-----------|-----------|-----------|
| PUB30COM-17-PUB30COM-11 | 0.78475753  | -1.592697 | 3.162212  | 0.9283330 |
| pub30pub31-PUB30COM-11  | 13.21468474 | 10.837230 | 15.592139 | 0.0000000 |
| PUB31COM-10-PUB30COM-11 | -0.40644726 | -2.783902 | 1.971007  | 0.9960985 |

|                         |              |            |            |           |
|-------------------------|--------------|------------|------------|-----------|
| PUB31COM-27-PUB30COM-11 | 4.80273328   | 2.425279   | 7.180188   | 0.0000011 |
| WT-PUB30COM-11          | -0.46749324  | -2.844948  | 1.909961   | 0.9924997 |
| pub30pub31-PUB30COM-17  | 12.42992721  | 10.052473  | 14.807382  | 0.0000000 |
| PUB31COM-10-PUB30COM-17 | -1.19120479  | -3.568659  | 1.186250   | 0.6894929 |
| PUB31COM-27-PUB30COM-17 | 4.01797575   | 1.640521   | 6.395430   | 0.0000591 |
| WT-PUB30COM-17          | -1.25225077  | -3.629705  | 1.125204   | 0.6421288 |
| PUB31COM-10-pub30pub31  | -13.62113200 | -15.998586 | -11.243678 | 0.0000000 |
| PUB31COM-27-pub30pub31  | -8.41195146  | -10.789406 | -6.034497  | 0.0000000 |
| WT-pub30pub31           | -13.68217798 | -16.059632 | -11.304724 | 0.0000000 |
| PUB31COM-27-PUB31COM-10 | 5.20918054   | 2.831726   | 7.586635   | 0.0000001 |
| WT-PUB31COM-10          | -0.06104598  | -2.438500  | 2.316408   | 0.9999997 |
| WT-PUB31COM-27          | -5.27022652  | -7.647681  | -2.892772  | 0.0000001 |

### #Extended Fig.1g Stomatal Index of complementation lines

\$genotype

|                         | diff       | lwr         | upr       | p adj     |
|-------------------------|------------|-------------|-----------|-----------|
| PUB30COM-17-PUB30COM-11 | 0.2043481  | -2.8277825  | 3.236479  | 0.9999542 |
| pub30pub31-PUB30COM-11  | -7.4803420 | -10.5124726 | -4.448211 | 0.0000000 |
| PUB31COM-10-PUB30COM-11 | -2.3260616 | -5.3581922  | 0.706069  | 0.2257018 |
| PUB31COM-27-PUB30COM-11 | -0.4104618 | -3.4425925  | 2.621669  | 0.9986074 |
| WT-PUB30COM-11          | 0.3246870  | -2.7074437  | 3.356818  | 0.9995529 |
| pub30pub31-PUB30COM-17  | -7.6846901 | -10.7168207 | -4.652559 | 0.0000000 |
| PUB31COM-10-PUB30COM-17 | -2.5304097 | -5.5625403  | 0.501721  | 0.1528047 |
| PUB31COM-27-PUB30COM-17 | -0.6148099 | -3.6469405  | 2.417321  | 0.9906661 |
| WT-PUB30COM-17          | 0.1203389  | -2.9117917  | 3.152470  | 0.9999967 |
| PUB31COM-10-pub30pub31  | 5.1542804  | 2.1221498   | 8.186411  | 0.0000838 |
| PUB31COM-27-pub30pub31  | 7.0698801  | 4.0377495   | 10.102011 | 0.0000001 |
| WT-pub30pub31           | 7.8050289  | 4.7728983   | 10.837160 | 0.0000000 |
| PUB31COM-27-PUB31COM-10 | 1.9155997  | -1.1165309  | 4.947730  | 0.4334050 |
| WT-PUB31COM-10          | 2.6507485  | -0.3813821  | 5.682879  | 0.1192167 |
| WT-PUB31COM-27          | 0.7351488  | -2.2969818  | 3.767279  | 0.9791411 |

### #Extended Fig.3h Pedicel length of PUB inactive E3 ligase mutations

\$genotype

|                           | diff      | lwr         | upr         | p adj     |
|---------------------------|-----------|-------------|-------------|-----------|
| PUB30W97Acom-pub30pub31   | -0.118125 | -0.27671014 | 0.04046014  | 0.2000235 |
| PUB31W93Acom-pub30pub31   | -0.053375 | -0.21196014 | 0.10521014  | 0.7949745 |
| WT-pub30pub31             | -0.859000 | -1.01758514 | -0.70041486 | 0.0000000 |
| PUB31W93Acom-PUB30W97Acom | 0.064750  | -0.09383514 | 0.22333514  | 0.6836203 |
| WT-PUB30W97Acom           | -0.740875 | -0.89946014 | -0.58228986 | 0.0000000 |
| WT-PUB31W93Acom           | -0.805625 | -0.96421014 | -0.64703986 | 0.0000000 |

### #Extended Fig.3i Stomatal Index of PUB inactive E3 ligase mutations

\$genotype

|                    | diff     | lwr       | upr       | p adj     |
|--------------------|----------|-----------|-----------|-----------|
| 31WAcom-30WAcom    | 1.054925 | -3.063300 | 5.173151  | 0.8934655 |
| pub30pub31-30WAcom | 2.976321 | -1.141904 | 7.094547  | 0.2182122 |
| WT-30WAcom         | 8.483532 | 4.365306  | 12.601757 | 0.0000419 |
| pub30pub31-31WAcom | 1.921396 | -2.196829 | 6.039622  | 0.5796845 |
| WT-31WAcom         | 7.428607 | 3.310381  | 11.546832 | 0.0002433 |
| WT-pub30pub31      | 5.507210 | 1.388985  | 9.625436  | 0.0059159 |

### #Extended Fig.5f Pedicel length of PUB phosphosite mutations

| \$genotype          | diff     | lwr        | upr       | p adj     |
|---------------------|----------|------------|-----------|-----------|
| T151Acom-pub30pub31 | -1.94625 | -4.240691  | 0.348191  | 0.1379326 |
| T151Dcom-pub30pub31 | -8.36000 | -10.654441 | -6.065559 | 0.0000000 |
| T155Acom-pub30pub31 | -1.59000 | -3.884441  | 0.704441  | 0.3229135 |
| T155Dcom-pub30pub31 | -9.92000 | -12.214441 | -7.625559 | 0.0000000 |
| WT-pub30pub31       | -8.79500 | -11.089441 | -6.500559 | 0.0000000 |
| T151Dcom-T151Acom   | -6.41375 | -8.708191  | -4.119309 | 0.0000000 |
| T155Acom-T151Acom   | 0.35625  | -1.938191  | 2.650691  | 0.9971375 |
| T155Dcom-T151Acom   | -7.97375 | -10.268191 | -5.679309 | 0.0000000 |
| WT-T151Acom         | -6.84875 | -9.143191  | -4.554309 | 0.0000000 |
| T155Acom-T151Dcom   | 6.77000  | 4.475559   | 9.064441  | 0.0000000 |
| T155Dcom-T151Dcom   | -1.56000 | -3.854441  | 0.734441  | 0.3434349 |
| WT-T151Dcom         | -0.43500 | -2.729441  | 1.859441  | 0.9927097 |
| T155Dcom-T155Acom   | -8.33000 | -10.624441 | -6.035559 | 0.0000000 |
| WT-T155Acom         | -7.20500 | -9.499441  | -4.910559 | 0.0000000 |
| WT-T155Dcom         | 1.12500  | -1.169441  | 3.419441  | 0.6884943 |

### #Extended Fig.3g Stomatal Index of PUB phosphosite mutations

| \$genotype                  | diff        | lwr        | upr        | p adj     |
|-----------------------------|-------------|------------|------------|-----------|
| PUB30TI55Acom-pub30pub31    | 1.5663023   | -1.711486  | 4.8440905  | 0.7197942 |
| PUB30TI55Dcom-pub30pub31    | 11.5050768  | 8.227289   | 14.7828650 | 0.0000000 |
| PUB31T151Acom-pub30pub31    | 0.6440196   | -2.633769  | 3.9218078  | 0.9919227 |
| PUB31T151Dcom-pub30pub31    | 10.1087599  | 6.830972   | 13.3865481 | 0.0000000 |
| WT-pub30pub31               | 7.8050289   | 4.527241   | 11.0828172 | 0.0000001 |
| PUB30TI55Dcom-PUB30TI55Acom | 9.9387745   | 6.660986   | 13.2165628 | 0.0000000 |
| PUB31T151Acom-PUB30TI55Acom | -0.9222827  | -4.200071  | 2.3555055  | 0.9603390 |
| PUB31T151Dcom-PUB30TI55Acom | 8.5424576   | 5.264669   | 11.8202459 | 0.0000000 |
| WT-PUB30TI55Acom            | 6.2387266   | 2.960938   | 9.5165149  | 0.0000098 |
| PUB31T151Acom-PUB30TI55Dcom | -10.8610572 | -14.138845 | -7.5832690 | 0.0000000 |
| PUB31T151Dcom-PUB30TI55Dcom | -1.3963169  | -4.674105  | 1.8814713  | 0.8057015 |
| WT-PUB30TI55Dcom            | -3.7000479  | -6.977836  | -0.4222597 | 0.0183274 |
| PUB31T151Dcom-PUB31T151Acom | 9.4647403   | 6.186952   | 12.7425285 | 0.0000000 |
| WT-PUB31T151Acom            | 7.1610093   | 3.883221   | 10.4387976 | 0.0000005 |
| WT-PUB31T151Dcom            | -2.3037310  | -5.581519  | 0.9740572  | 0.3148091 |
